# Supplementary material
Source: PubMed Central journal article supplement (PMC7944860)
Supplement: mmc1.pdf [file mmc1.pdf]

Supplemental data for the manuscript:

**Combined *in silico* and *in vitro* approaches identified the antipsychotic drug lurasidone and the antiviral drug elbasvir as SARS-CoV2 and HCoV-OC43 inhibitors**

Mario Milani, Manuela Donalisio, Rafaela Milan Bonotto, Edoardo Schneider, Irene Arduino, Francesco Boni, David Lembo, Alessandro Marcello \*, Eloise Mastrangelo \*

Table S1. List of the first best 60 compounds selected by *in silico* docking. In red the compounds selected for cell-based assays.

| in silico ranking | Cpd            | name                 | predicted ki [nM] |
|-------------------|----------------|----------------------|-------------------|
| 1                 | DB09534        | Ecamsule             | 2.7               |
| 2                 | DB02633        | Cibacron Blue        | 3.1               |
| 3                 | DB01830        | AP-22408             | 4.2               |
| 4                 | DB01879        | <i>experimental</i>  | 4.3               |
| <b>5</b>          | <b>DB11363</b> | <b>Alectinib</b>     | <b>8.5</b>        |
| 6                 | DB04330        | Bilh 434             | 12.2              |
| <b>7</b>          | <b>DB09042</b> | <b>Tedizolid</b>     | <b>20.2</b>       |
| 8                 | DB03276        | <i>experimental</i>  | 26.7              |
| <b>9</b>          | <b>DB08901</b> | <b>Ponatinib</b>     | <b>29.4</b>       |
| 10                | DB06581        | Bevirimat            | 29.6              |
| 11                | DB04016        | <i>experimental</i>  | 30.0              |
| <b>12</b>         | <b>DB02329</b> | <b>Carbenoxolone</b> | <b>34.8</b>       |
| <b>13</b>         | <b>DB08815</b> | <b>Lurasidone</b>    | <b>64.3</b>       |
| 14                | DB08823        | Spinosad             | 71.8              |
| 15                | DB05340        | ATL-2502             | 86.1              |
| 16                | DB07189        | <i>experimental</i>  | 110.2             |
| 17                | DB09335        | Alatrofloxacin       | 115.3             |
| <b>18</b>         | <b>DB01329</b> | <b>Cefoperazone</b>  | <b>115.7</b>      |
| 19                | DB01396        | Digitoxin            | 148.6             |
| 20                | DB03712        | RU85053              | 164.9             |
| <b>21</b>         | <b>DB11574</b> | <b>Elbasvir</b>      | <b>167.6</b>      |
| 22                | DB06210        | Eltrombopag          | 195.9             |
| <b>23</b>         | <b>DB00444</b> | <b>Teniposide</b>    | <b>204.3</b>      |
| <b>24</b>         | <b>DB11581</b> | <b>Venetoclax</b>    | <b>208.4</b>      |
| 25                | DB09233        | Cronidipine          | 212.8             |
| 26                | DB02432        | RU90395              | 216.7             |
| <b>27</b>         | <b>DB00762</b> | <b>Irinotecan</b>    | <b>247.6</b>      |
| 28                | DB01988        | <i>experimental</i>  | 251.2             |
| 29                | DB02169        | <i>experimental</i>  | 259.4             |
| 30                | DB04289        | Genz-10850           | 279.2             |

| in silico ranking | Cpd            | name                | predicted ki [nM] |
|-------------------|----------------|---------------------|-------------------|
| 31                | DB07213        | <i>experimental</i> | 289.6             |
| <b>32</b>         | <b>DB06290</b> | <b>Simeprevir</b>   | <b>292.1</b>      |
| 33                | DB01836        | <i>experimental</i> | 376.4             |
| 34                | DB05868        | Ciluprevir          | 390.4             |
| 35                | DB00511        | Acetyldigitoxin     | 416.1             |
| 36                | DB09280        | Lumacaftor          | 454.3             |
| 37                | DB01251        | Gliquidone          | 464.8             |
| 38                | DB06925        | <i>experimental</i> | 485.7             |
| 39                | DB04888        | Bifeprunox          | 519.3             |
| 40                | DB03957        | SP2456              | 526.8             |
| 41                | DB04881        | Elacridar           | 527.0             |
| 42                | DB08512        | <i>experimental</i> | 590.0             |
| 43                | DB02112        | Zk-806450           | 596.1             |
| 44                | DB02194        | <i>experimental</i> | 602.5             |
| 45                | DB04698        | <i>experimental</i> | 618.0             |
| 46                | DB01267        | Paliperidone        | 632.9             |
| <b>47</b>         | <b>DB11575</b> | <b>Grazoprevir</b>  | <b>639.9</b>      |
| 48                | DB00872        | Conivaptan          | 696.8             |
| 49                | DB04673        | <i>experimental</i> | 697.5             |
| 50                | DB04877        | Voacamine           | 709.5             |
| 51                | DB07847        | <i>experimental</i> | 726.0             |
| 52                | DB01897        | <i>experimental</i> | 740.9             |
| 53                | DB03933        | C-1027              | 799.3             |
| 54                | DB00773        | Etoposide           | 801.5             |
| 55                | DB08164        | <i>experimental</i> | 803.0             |
| 56                | DB08237        | <i>experimental</i> | 850.0             |
| 57                | DB08676        | <i>experimental</i> | 855.5             |
| 58                | DB00430        | Cefpiramide         | 864.2             |
| <b>59</b>         | <b>DB00826</b> | <b>Natamycin</b>    | <b>945.3</b>      |
| 60                | DB01459        | Bezitramide         | 953.5             |

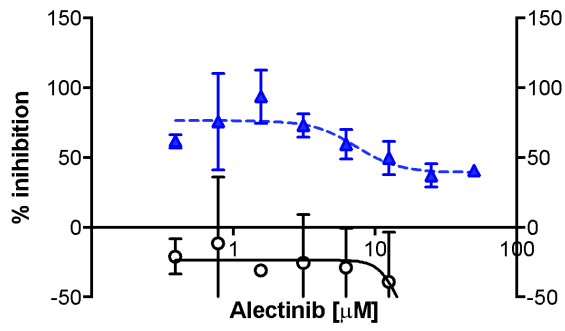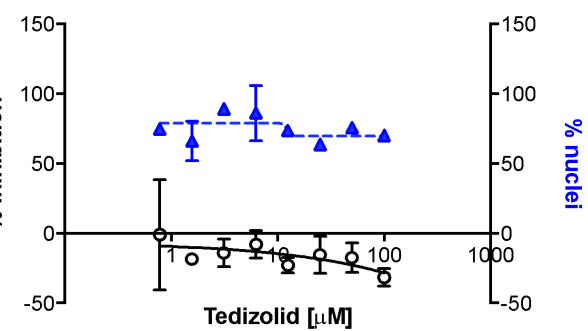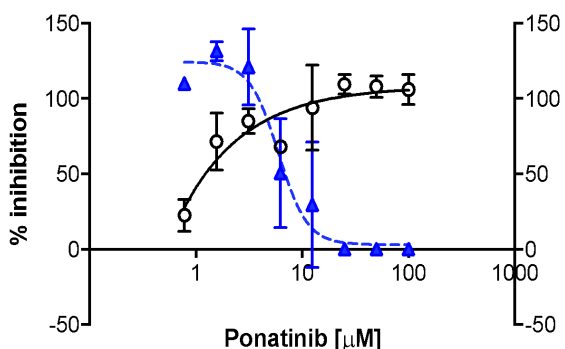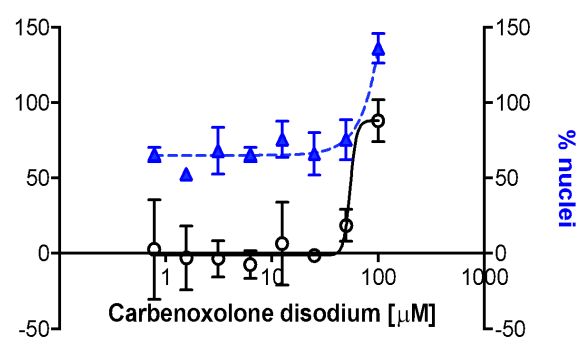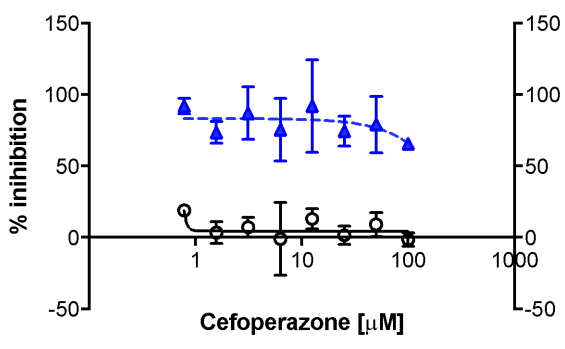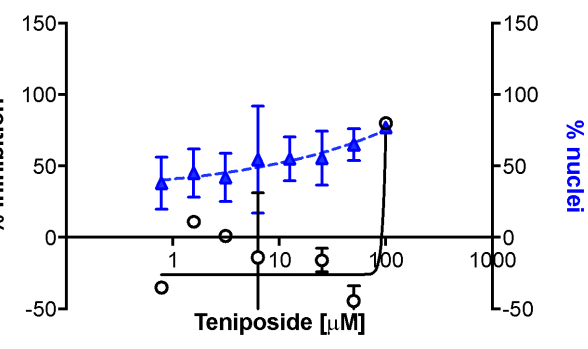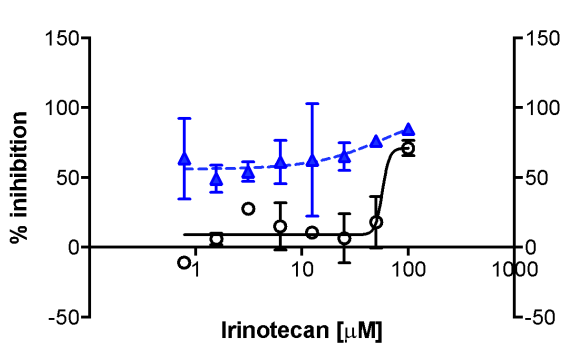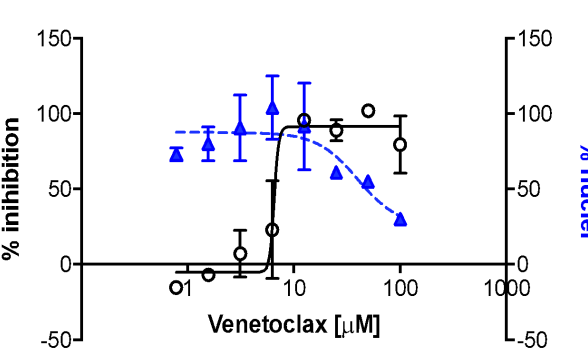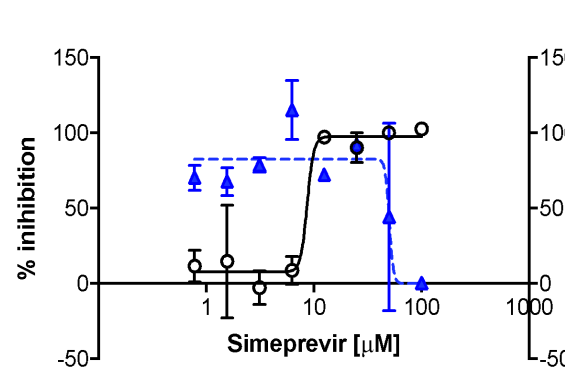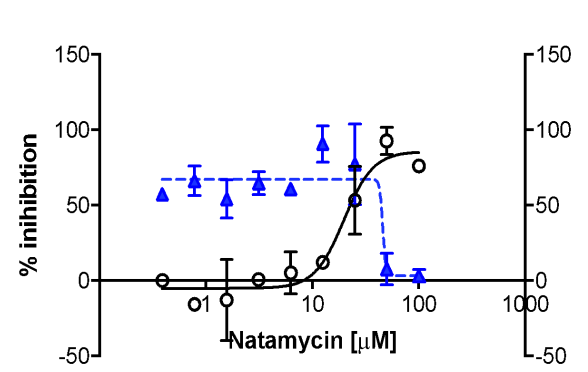

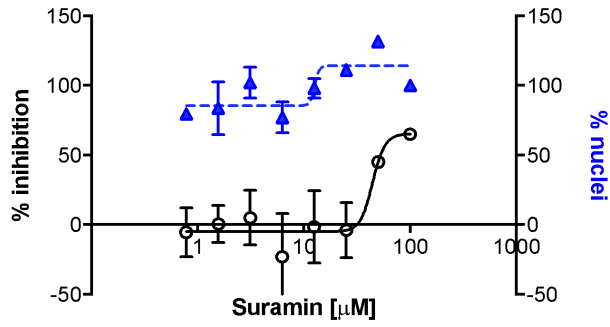

Figure S1: Antiviral efficacy of the selected compounds against SARS-CoV2. The antiviral activity of compounds was evaluated infecting Huh7-hACE2 cells in presence of increasing concentration of compounds. Number of nuclei were quantified in parallel. The percentage inhibition (white dots) was normalized with the average infection ratio of wells treated with 1% DMSO. Percentage of nuclei (blue triangles) was calculated by comparing the average number of nuclei of non-infected wells treated with 1% DMSO. Error bars represent the standard deviation (SD) of 2 independent experiments.

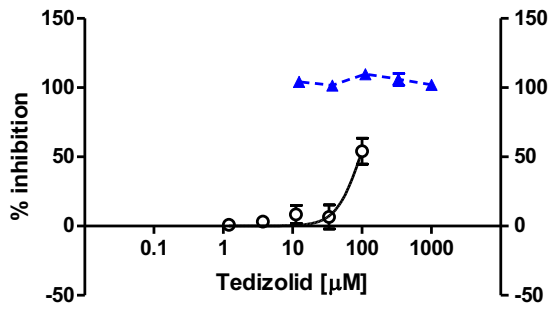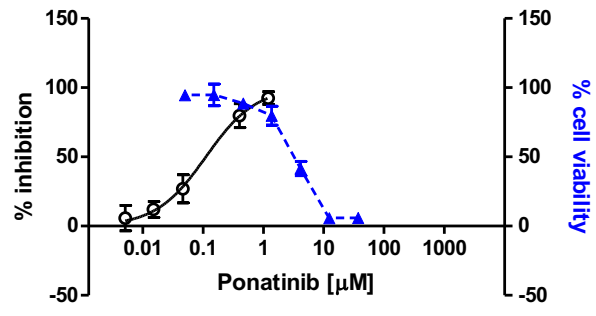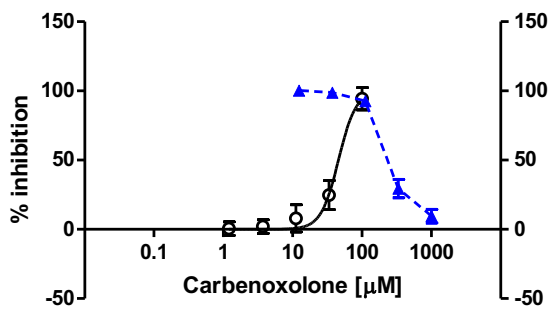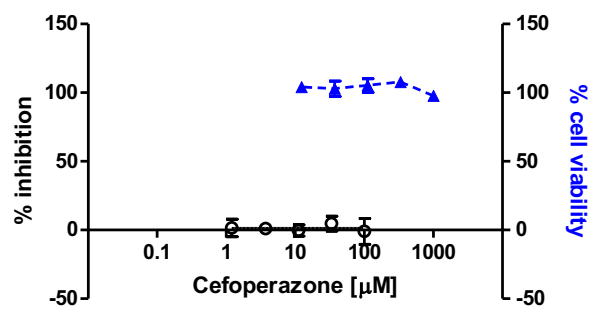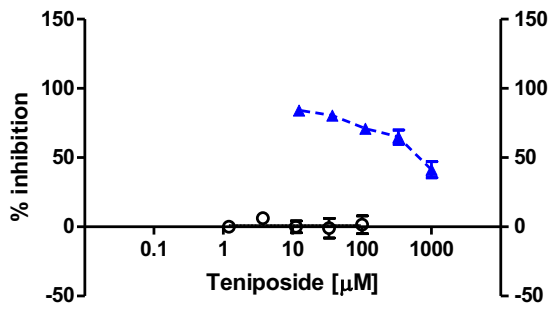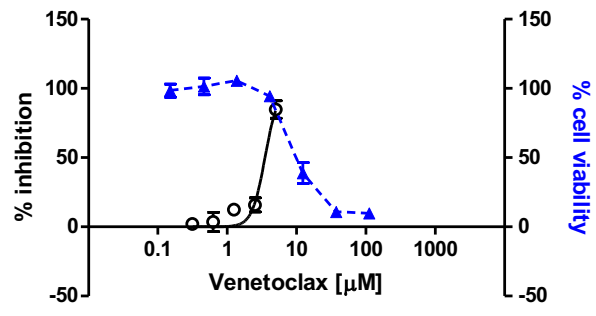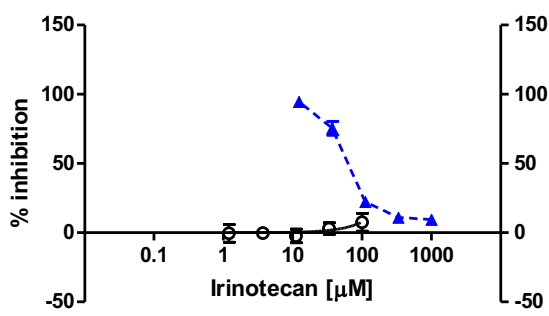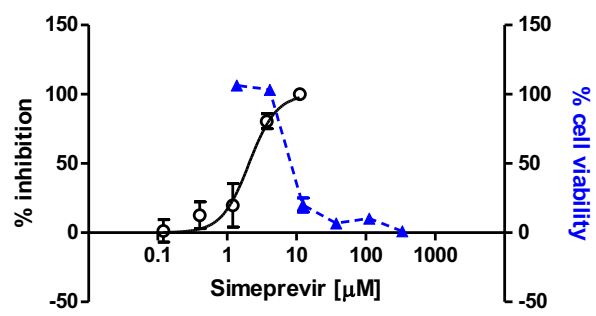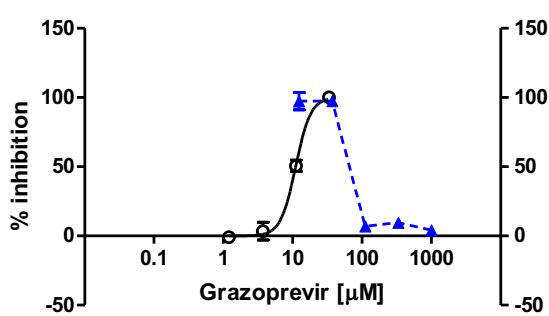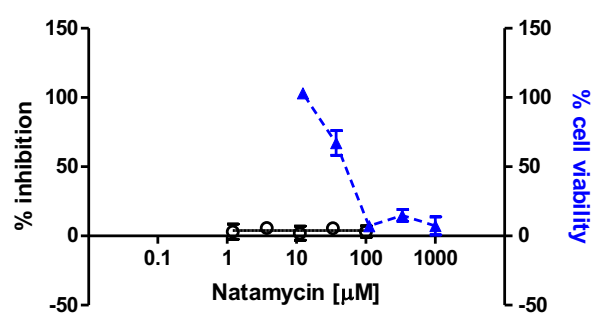

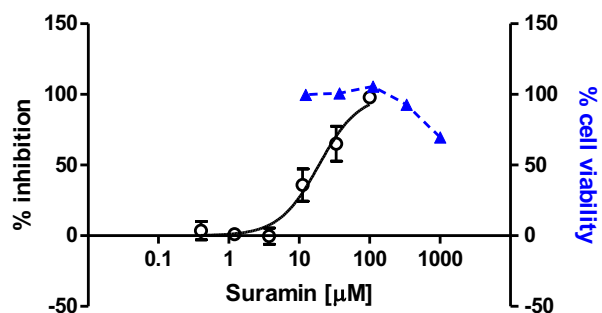

Figure S2: Antiviral efficacy of the selected compounds against HCoV-OC43. The antiviral activity of compounds was evaluated infecting MRC-5 cells in presence of increasing concentration of compounds. Cell viability assays were performed in the same conditions as for antiviral assays, in absence of viral inoculum. The percentage inhibition (white dots) and the percentage of cell viability (blue triangles) were calculated by comparing treated and untreated wells. Error bars represent the standard deviation (SD) of 3 independent experiments.
